# Supplementary material
Source: publisher figshare collection journal article supplement (https://sage.figshare.com/ndownloader/files/12371087)
Supplement: Supplementary file 1 [file 12371087]

**Supplemental table 1.** Baseline demographics and clinical characteristics in patients with  $\geq 3$  prior treatment failures

|                                  | <b>Placebo<br/>N=286</b> | <b>Erenumab<br/>70 mg<br/>N=191</b> | <b>Erenumab<br/>140 mg<br/>N=190</b> |
|----------------------------------|--------------------------|-------------------------------------|--------------------------------------|
| <b>N (%)<sup>a</sup></b>         | 98 (34.3)                | 69 (36.1)                           | 65 (34.2)                            |
| <b>Age, years</b>                | 42.4 (11.5)              | 42.8 (11.5)                         | 44.1 (11.3)                          |
| <b>Female, n (%)<sup>b</sup></b> | 72 (73.5)                | 62 (89.9)                           | 59 (90.8)                            |
| <b>Disease duration, years</b>   | 24.8 (13.2)              | 24.5 (13.3)                         | 24.6 (11.9)                          |
| <b>MMD</b>                       | 18.6 (4.3)               | 18.9 (4.4)                          | 19.0 (4.7)                           |
| <b>Use of MSM, n (%)</b>         | 90 (91.8)                | 62 (89.9)                           | 60 (92.3)                            |
| <b>Monthly MSMD</b>              | 12.0 (7.1)               | 11.0 (7.6)                          | 12.5 (6.1)                           |
| <b>Medication Overuse, n (%)</b> | 42 (42.9)                | 30 (43.5)                           | 27 (41.5)                            |

Data are mean (SD) unless stated otherwise. <sup>a</sup> Percentages represent the number of patients in each prior treatment failure subgroup out of the total patients by treatment subgroup; <sup>b</sup> percentages represent categorical variables compared to the total number of patients in each treatment subgroup by prior treatment failure.

MMD, monthly migraine days; MSM, migraine-specific medication; MSMD, acute migraine-specific medication days; N, number of patients in the analysis set; SD, standard deviation
